# Supplementary material for: Magneto-Mechanical Enhancement of Elastic Moduli in Magnetoactive Elastomers with Anisotropic Microstructures
Source: MDPI journal article supplement (doi:10.3390/ma15020645), 2022-01-15
Supplement: s1 [file s1]

## Supporting Information

### Magneto-mechanical enhancement of elastic moduli in magnetoactive elastomers

Sanket Chougale<sup>1</sup>, Dirk Romeis<sup>1</sup>, Marina Saphiannikova<sup>1</sup>

<sup>1</sup>Leibniz Intitute of Polymer Research, Dresden

Corresponding author: [chougale@ipfdd.de](mailto:chougale@ipfdd.de)

The magneto-induced deformations and the MR effect are shown as a function of the initial aspect ratio  $\gamma_0$  for different values  $\phi_p$  at constant  $\phi = 0.3$ . In figures (S1), (S2) and (S3) the shifting of maxima can be seen with respect to the parameter  $\phi_p$  for MAEs with SCs and SDs microstructures. The parameter  $\phi_p$  is varied from  $\phi_p = \phi$  to  $\phi_p = 0.4$ . All figures are plotted for  $|\vec{H}_0| = 470$  kA/m,  $G_m = 17$  kPa.

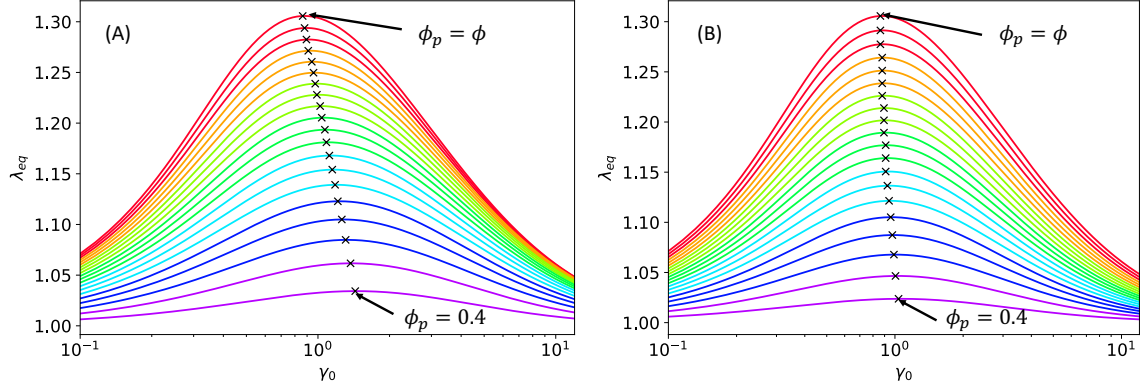

Figure S1: The magneto-induced elongations of anisotropic MAEs as a function of the initial aspect ratio  $\gamma_0$  at different volume fractions  $\phi_p$  and  $\phi = 0.3$ . (A) For smeared columns, (B) for smeared disks.

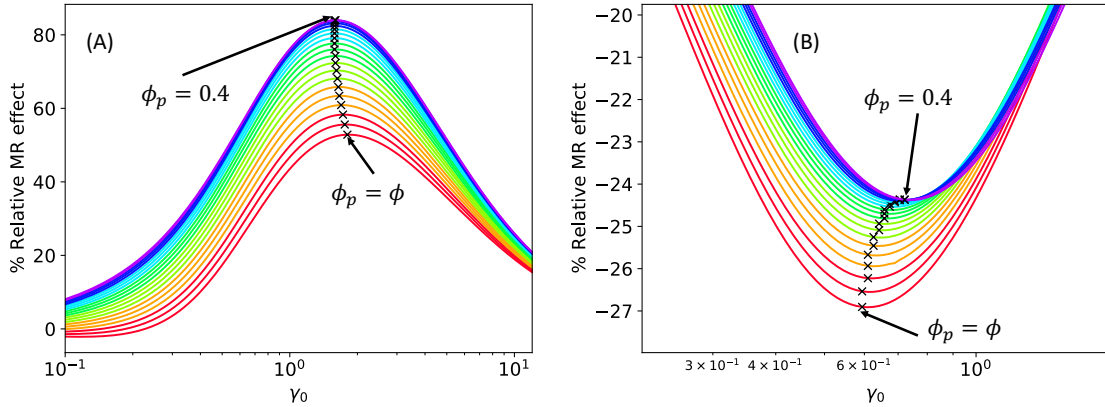

Figure S2: The magneto-rheological effect of anisotropic MAEs with SCs as a function of the initial aspect ratio  $\gamma_0$  at different volume fractions  $\phi_p$  and  $\phi = 0.3$ . (A) The MR effect along  $\vec{H}_0$ , (B) The MR effect perpendicular to  $\vec{H}_0$ .

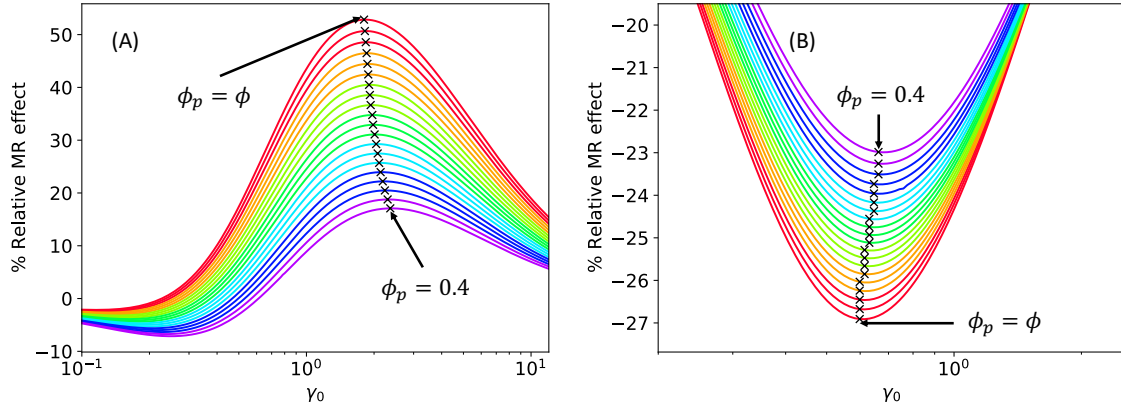

Figure S3: The magneto-rheological effect of anisotropic MAEs with SDs as a function of the initial aspect ratio  $\gamma_0$  at different volume fractions  $\phi_p$  and  $\phi = 0.3$ . (A) The MR effect along  $\vec{H}_0$ , (B) The MR effect perpendicular to  $\vec{H}_0$ .
