# Supplementary figures and images for: Magneto-Mechanical Enhancement of Elastic Moduli in Magnetoactive Elastomers with Anisotropic Microstructures
Source: MDPI journal article supplement (doi:10.3390/ma15020645), 2022-01-15

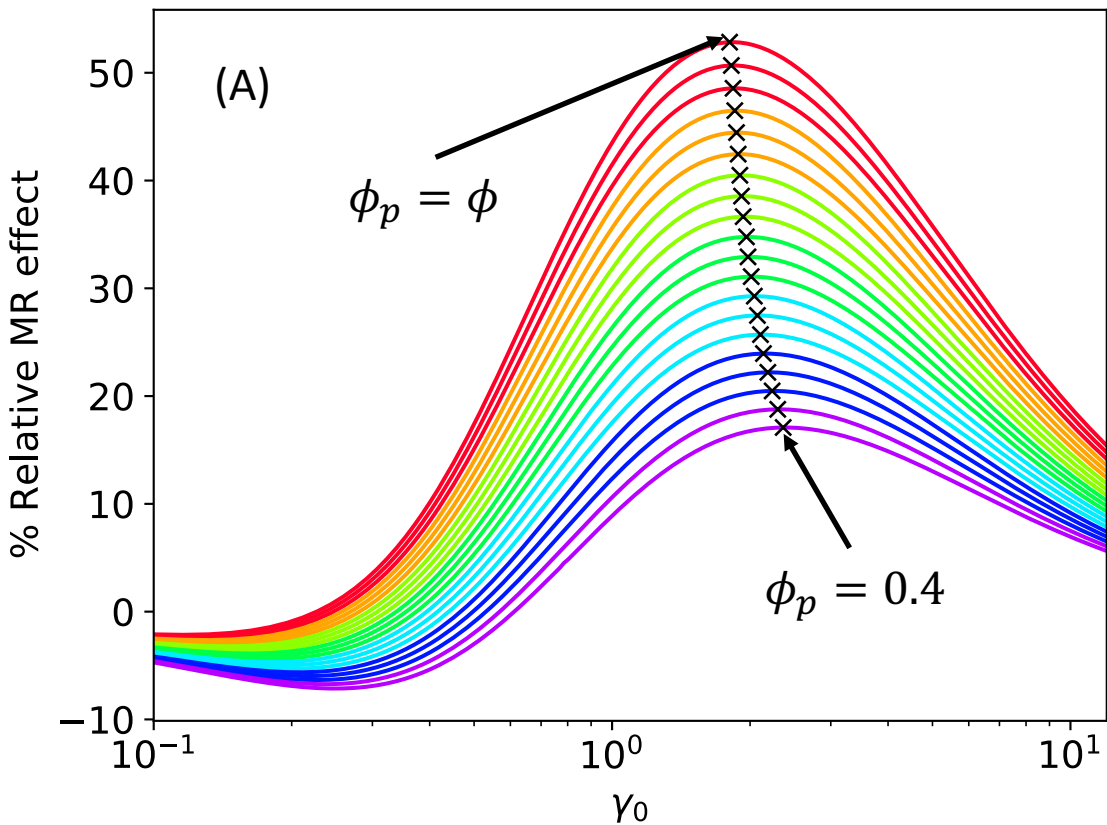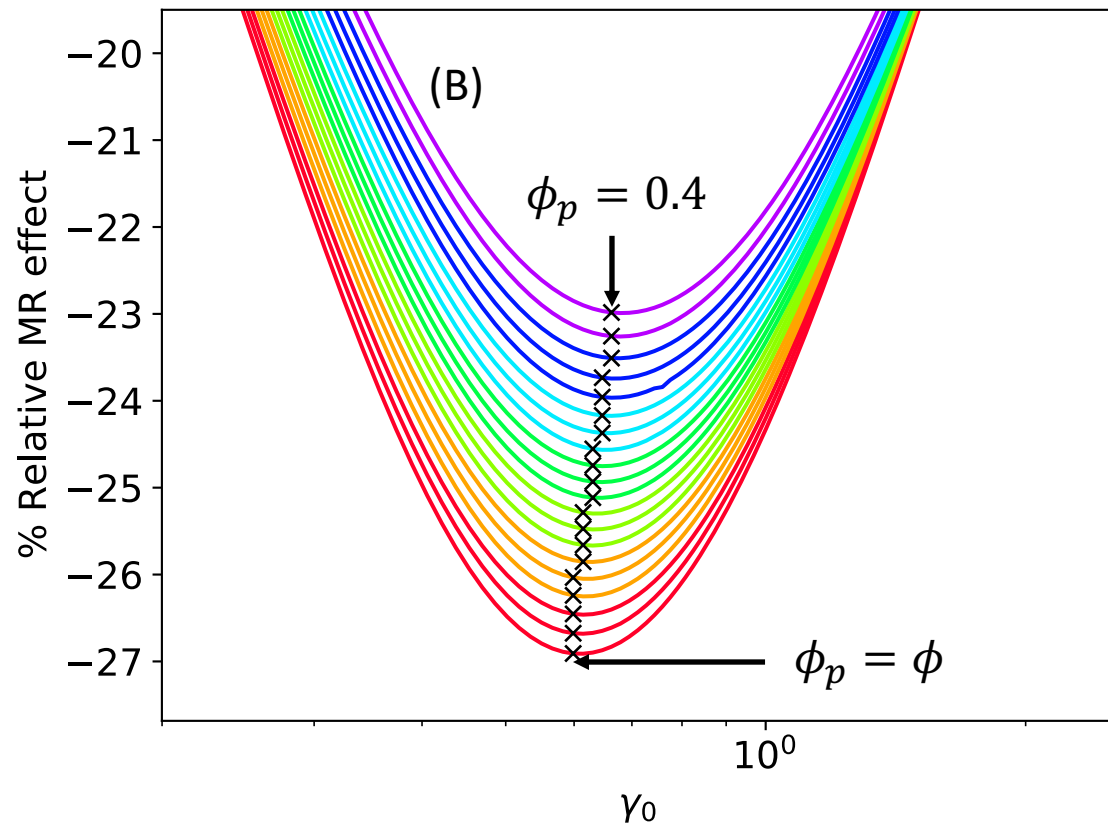

Supplement: s1 [file s1]

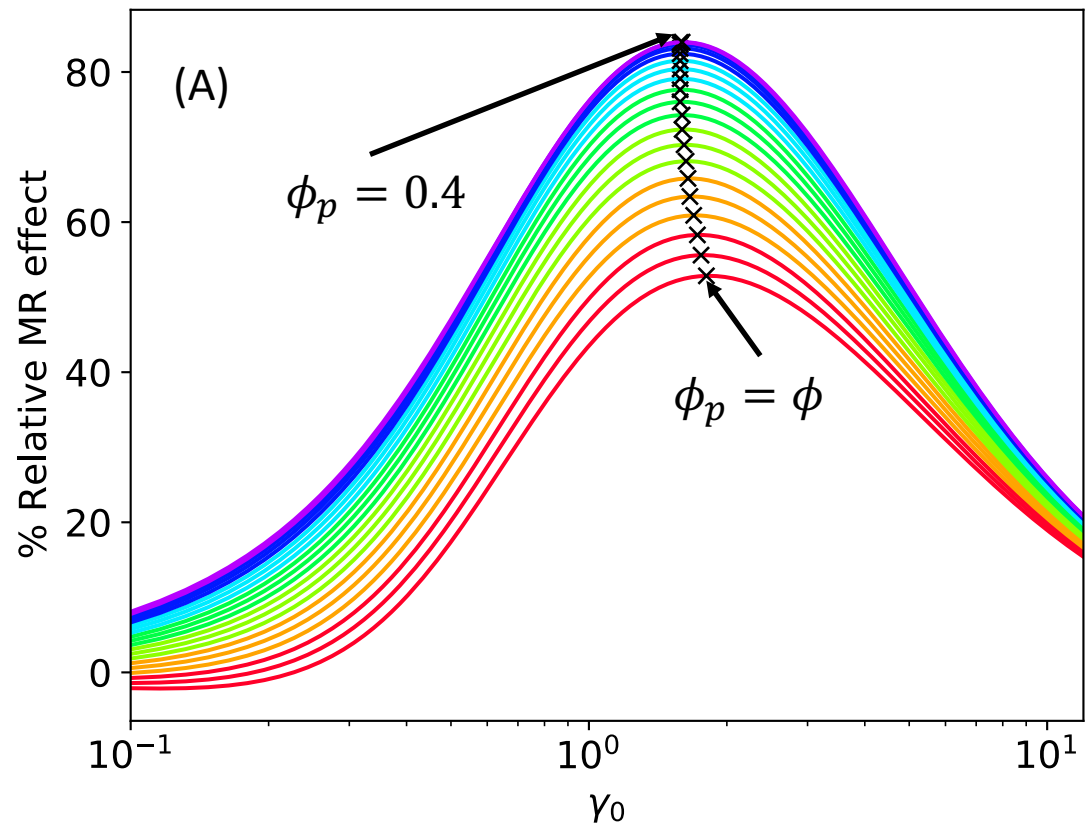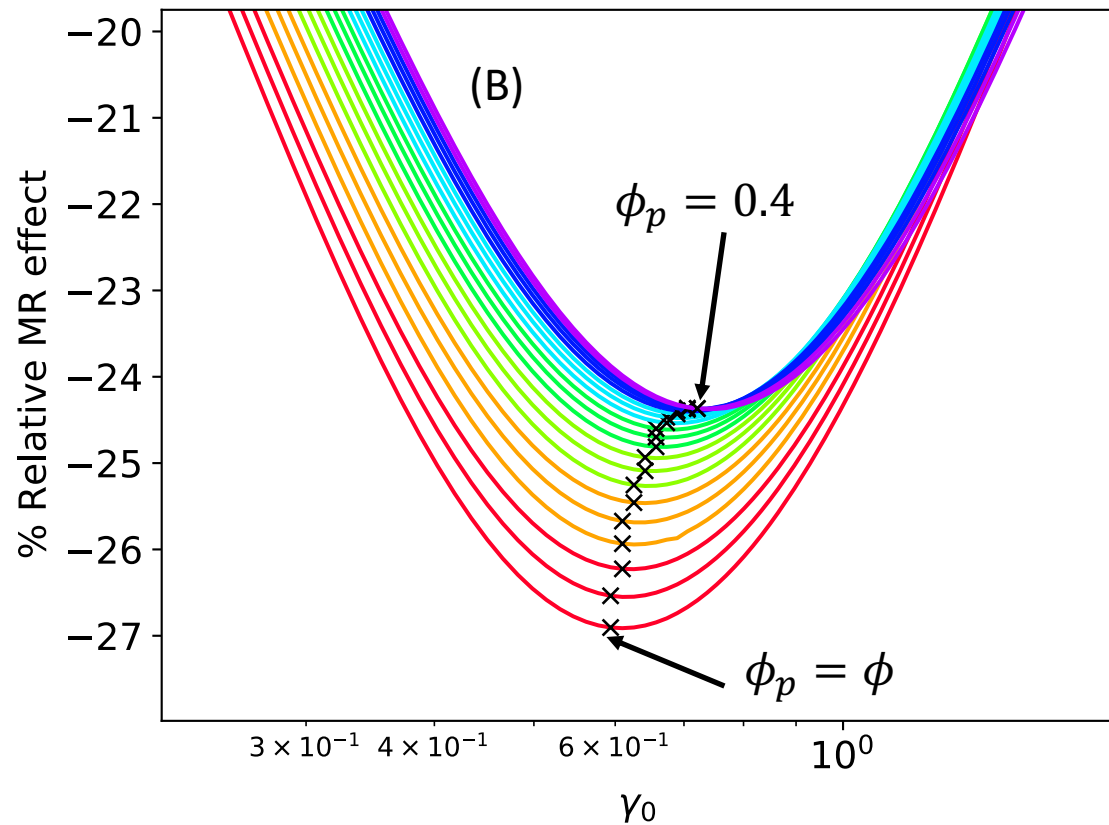

Supplement: s1 [file s1]

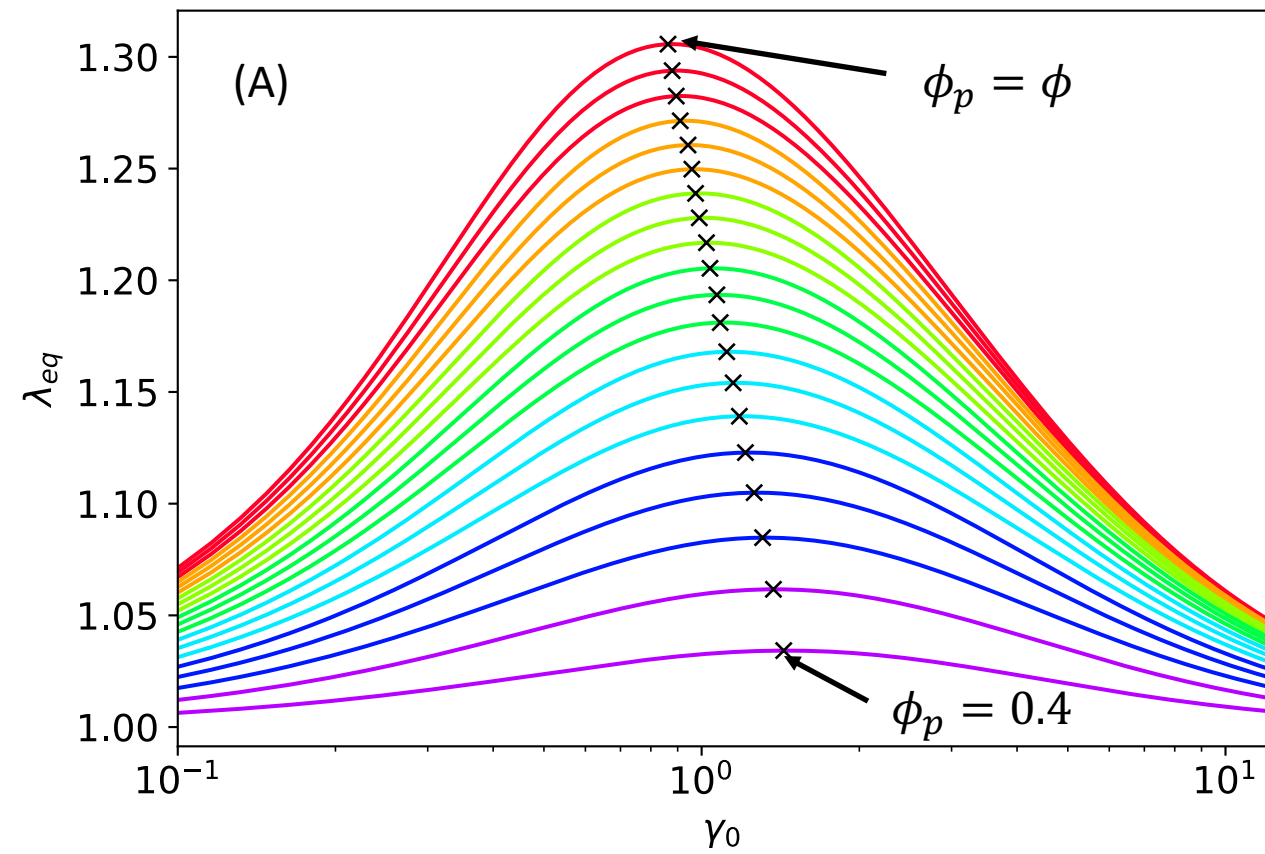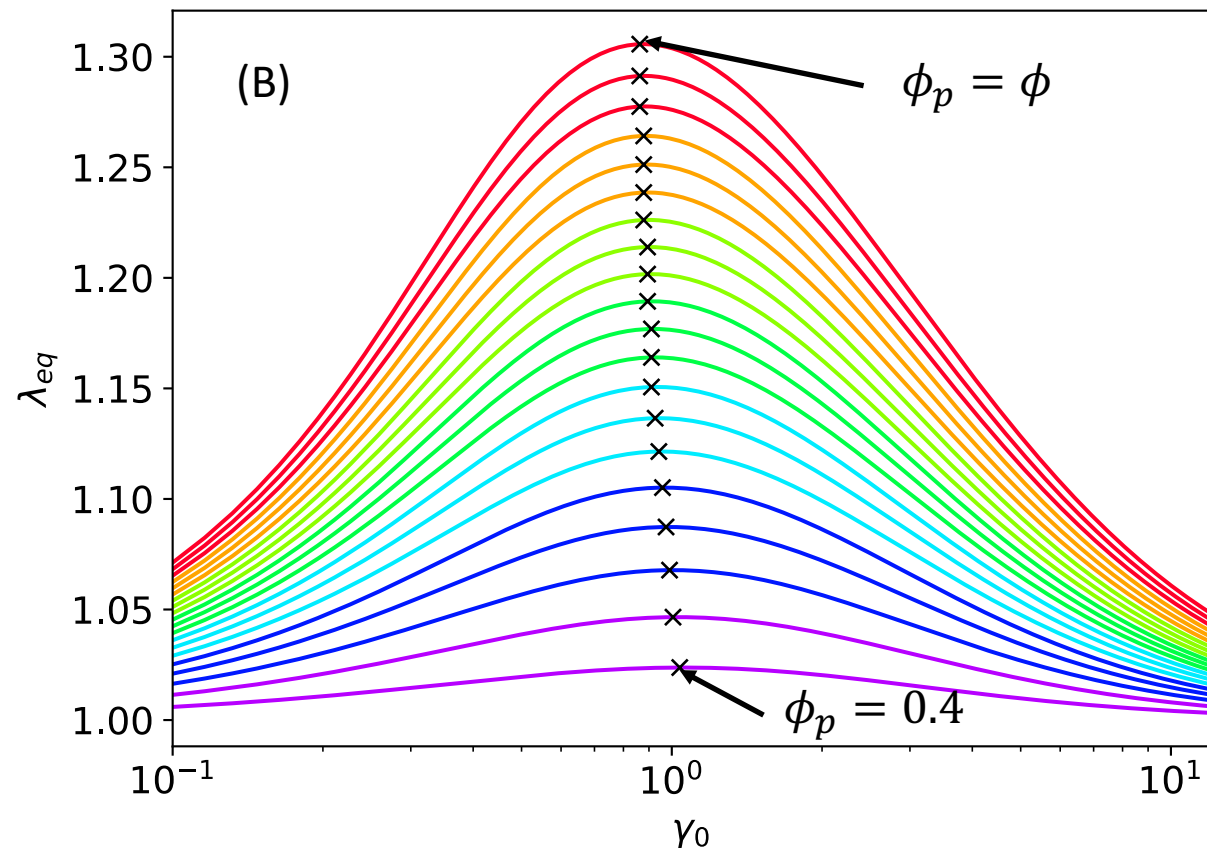

Supplement: s1 [file s1]
